# Supplementary material for: A new technique for minimally invasive irreversible electroporation of tumors in the head and body of the pancreas
Source: Springer Nature journal article supplement (doi:10.1007/s00464-016-5173-6), 2016-08-29
Supplement: MOESM1 [file 10632254]

Patient Data: anonymizedID: anonymized
